# Supplementary material for: Patterns of richness, diversity and abundance of an odonate assemblage from a tropical dry forest in the Santiago Dominguillo Region, Oaxaca, México (Insecta: Odonata)
Source: Biodivers Data J. 2021 Apr 22;9:e60980. doi: 10.3897/BDJ.9.e60980 (PMC8084849; doi:10.3897/BDJ.9.e60980)
Supplement: Supplementary material 2 — Dictionary of database fields [file bdj-09-e60980-s002.xlsx]

## Sheet: Darwin Core
#	Category	Term name	Term definition	Term examples	Term URI	type
1	root	dcterms:type	The nature or genre of the resource. For Darwin Core, recommended best practice is to use the name of the class that defines the root of the record.	"StillImage", "MovingImage", "Sound", "PhysicalObject", "Event"	http://purl.org/dc/terms/type	xs:string
2	root	dcterms:modified	The most recent date-time on which the resource was changed. For Darwin Core, recommended best practice is to use an encoding scheme, such as ISO 8601:2004(E).	"1963-03-08T14:07-0600" is 8 Mar 1963 2:07pm in the time zone six hours earlier than UTC, "2009-02-20T08:40Z" is 20 Feb 2009 8:40am UTC, "1809-02-12" is 12 Feb 1809, "1906-06" is Jun 1906, "1971" is just that year, "2007-03-01T13:00:00Z/2008-05-11T15:30:00Z" is the interval between 1 Mar 2007 1pm UTC and 11 May 2008 3:30pm UTC, "2007-11-13/15" is the interval between 13 Nov 2007 and 15 Nov 2007.	http://purl.org/dc/terms/modified	xs:dateTime
3	root	dcterms:language	A language of the resource. Recommended best practice is to use a controlled vocabulary such as RFC 4646 [RFC4646].	"en" for English, "es" for Spanish.	http://purl.org/dc/terms/language	xs:string
4	root	dcterms:license	Information about rights held in and over the resource. Typically, rights information includes a statement about various property rights associated with the resource, including intellectual property rights.	"Content licensed under Creative Commons Attribution 3.0 United States License".	http://purl.org/dc/terms/rights	xs:string
5	root	dcterms:rightsHolder	A person or organization owning or managing rights over the resource.	"The Regents of the University of California."	http://purl.org/dc/terms/rightsHolder	xs:string
6	root	dcterms:accessRights	Information about who can access the resource or an indication of its security status. Access Rights may include information regarding access or restrictions based on privacy, security, or other policies.	"not-for-profit use only"	http://purl.org/dc/terms/accessRights	xs:string
7	root	dcterms:bibliographicCitation	A bibliographic reference for the resource as a statement indicating how this record should be cited (attributed) when used. Recommended practice is to include sufficient bibliographic detail to identify the resource as unambiguously as possible.	"Ctenomys sociabilis (MVZ 165861)" for a specimen, "Oliver P. Pearson. 1985. Los tuco-tucos (genera Ctenomys) de los Parques Nacionales Lanin y Nahuel Huapi, Argentina Historia Natural, 5(37):337-343." for a Taxon	http://purl.org/dc/terms/bibliographicCitation	xs:string
8	root	dcterms:references	A related resource that is referenced, cited, or otherwise pointed to by the described resource.	"http://mvzarctos.berkeley.edu/guid/MVZ:Mamm:165861"; "http://www.catalogueoflife.org/annual-checklist/show_species_details.php?record_id=6197868".	http://purl.org/dc/terms/references
9	root	institutionID	An identifier for the institution having custody of the object(s) or information referred to in the record.		http://rs.tdwg.org/dwc/terms/institutionID	xs:string
10	root	collectionID	An identifier for the collection or dataset from which the record was derived. For physical specimens, the recommended best practice is to use the identifier in a collections registry such as the Biodiversity Collections Index (http://www.biodiversitycollectionsindex.org/).	"urn:lsid:biocol.org:col:34818"	http://rs.tdwg.org/dwc/terms/collectionID	xs:string
11	root	datasetID	An identifier for the set of data. May be a global unique identifier or an identifier specific to a collection or institution.		http://rs.tdwg.org/dwc/terms/datasetID	xs:string
12	root	institutionCode	The name (or acronym) in use by the institution having custody of the object(s) or information referred to in the record.	"MVZ", "FMNH", "AKN-CLO", "University of California Museum of Paleontology (UCMP)"	http://rs.tdwg.org/dwc/terms/institutionCode	xs:string
13	root	collectionCode	The name, acronym, coden, or initialism identifying the collection or data set from which the record was derived.	"Mammals", "Hildebrandt", "eBird"	http://rs.tdwg.org/dwc/terms/collectionCode	xs:string
14	root	datasetName	The name identifying the data set from which the record was derived.	"Grinnell Resurvey Mammals", "Lacey Ctenomys Recaptures"	http://rs.tdwg.org/dwc/terms/datasetName	xs:string
15	root	ownerInstitutionCode	The name (or acronym) in use by the institution having ownership of the object(s) or information referred to in the record.	"NPS", "APN", "InBio"	http://rs.tdwg.org/dwc/terms/ownerInstitutionCode	xs:string
16	root	basisOfRecord	The specific nature of the data record - a subtype of the dcterms:type. Recommended best practice is to use a controlled vocabulary such as the Darwin Core Type Vocabulary (http://rs.tdwg.org/dwc/terms/type-vocabulary/index.htm).	"PreservedSpecimen", FossilSpecimen", LivingSpecimen", "HumanObservation", "MachineObservation"	http://rs.tdwg.org/dwc/terms/basisOfRecord	xs:string
17	root	informationWithheld	Additional information that exists, but that has not been shared in the given record.	"location information not given for endangered species", "collector identities withheld", "ask about tissue samples"	http://rs.tdwg.org/dwc/terms/informationWithheld	xs:string
18	root	dataGeneralizations	Actions taken to make the shared data less specific or complete than in its original form. Suggests that alternative data of higher quality may be available on request.	"Coordinates generalized from original GPS coordinates to the nearest half degree grid cell"	http://rs.tdwg.org/dwc/terms/dataGeneralizations	xs:string
19	root	dynamicProperties	A list (concatenated and separated) of additional measurements, facts, characteristics, or assertions about the record. Meant to provide a mechanism for structured content such as key-value pairs.	"tragusLengthInMeters=0.014; weightInGrams=120", "heightInMeters=1.5", "natureOfID=expert identification; identificationEvidence=cytochrome B sequence", "relativeHumidity=28; airTemperatureInC=22; sampleSizeInKilograms=10", "aspectHeading=277; slopeInDegrees=6", "iucnStatus=vulnerable; taxonDistribution=Neuquen, Argentina"	http://rs.tdwg.org/dwc/terms/dynamicProperties	xs:string
20	Occurrence	occurrenceID	An identifier for the Occurrence (as opposed to a particular digital record of the occurrence). In the absence of a persistent global unique identifier, construct one from a combination of identifiers in the record that will most closely make the occurrenceID globally unique.	For a specimen in the absence of a bona fide global unique identifier, for example, use the form: "urn:catalog:[institutionCode]:[collectionCode]:[catalogNumber]. "urn:lsid:nhm.ku.edu:Herps:32", "urn:catalog:FMNH:Mammal:145732"	http://rs.tdwg.org/dwc/terms/occurrenceID	dwc:nonEmptyString
21	Occurrence	catalogNumber	An identifier (preferably unique) for the record within the data set or collection.	"2008.1334", "145732a", "145732"	http://rs.tdwg.org/dwc/terms/catalogNumber	xs:string
22	Occurrence	occurrenceRemarks	Comments or notes about the Occurrence.	"found dead on road"	http://rs.tdwg.org/dwc/terms/occurrenceRemarks	xs:string
23	Occurrence	recordNumber	An identifier given to the Occurrence at the time it was recorded. Often serves as a link between field notes and an Occurrence record, such as a specimen collector's number.	"OPP 7101"	http://rs.tdwg.org/dwc/terms/recordNumber	xs:string
24	Occurrence	recordedBy	A list (concatenated and separated) of names of people, groups, or organizations responsible for recording the original Occurrence. The primary collector or observer, especially one who applies a personal identifier (recordNumber), should be listed first.	"Oliver P. Pearson; Anita K. Pearson" where the value in recordNumber "OPP 7101" corresponds to the number for the specimen in the field catalog (collector number) of Oliver P. Pearson.	http://rs.tdwg.org/dwc/terms/recordedBy	xs:string
25	Occurrence	individualID	An identifier for an individual or named group of individual organisms represented in the Occurrence. Meant to accommodate resampling of the same individual or group for monitoring purposes. May be a global unique identifier or an identifier specific to a data set.	"U.amer. 44", "Smedley", "Orca J 23"	http://rs.tdwg.org/dwc/terms/individualID	dwc:nonEmptyString
26	Occurrence	individualCount	The number of individuals represented present at the time of the Occurrence.	"1", "25"	http://rs.tdwg.org/dwc/terms/individualCount	xs:positiveInteger
27	Occurrence	sex	The sex of the biological individual(s) represented in the Occurrence. Recommended best practice is to use a controlled vocabulary.	"female", "hermaphrodite", "8 males, 4 females"	http://rs.tdwg.org/dwc/terms/sex	xs:string
28	Occurrence	lifeStage	The age class or life stage of the biological individual(s) at the time the Occurrence was recorded. Recommended best practice is to use a controlled vocabulary.	"egg", "eft", "juvenile", "adult", "2 adults 4 juveniles"	http://rs.tdwg.org/dwc/terms/lifeStage	xs:string
29	Occurrence	reproductiveCondition	The reproductive condition of the biological individual(s) represented in the Occurrence. Recommended best practice is to use a controlled vocabulary.	Examples" "non-reproductive", "pregnant", "in bloom", "fruit-bearing"	http://rs.tdwg.org/dwc/terms/reproductiveCondition	xs:string
30	Occurrence	behavior	A description of the behavior shown by the subject at the time the Occurrence was recorded. Recommended best practice is to use a controlled vocabulary.	"roosting", "foraging", "running"	http://rs.tdwg.org/dwc/terms/behavior	xs:string
31	Occurrence	establishmentMeans	The process by which the biological individual(s) represented in the Occurrence became established at the location. Recommended best practice is to use a controlled vocabulary.	"cultivated", "invasive", "escaped from captivity", "wild", "native"	http://rs.tdwg.org/dwc/terms/establishmentMeans	xs:string
32	Occurrence	occurrenceStatus	A statement about the presence or absence of a Taxon at a Location. Recommended best practice is to use a controlled vocabulary.	"present", "absent"	http://rs.tdwg.org/dwc/terms/occurrenceStatus	xs:string
33	Occurrence	preparations	A list (concatenated and separated) of preparations and preservation methods for a specimen.	"skin; skull; skeleton", "whole animal (ETOH); tissue (EDTA)", "fossil", "cast", "photograph", "DNA extract"	http://rs.tdwg.org/dwc/terms/preparations	xs:string
34	Occurrence	disposition	The current state of a specimen with respect to the collection identified in collectionCode or collectionID. Recommended best practice is to use a controlled vocabulary.	"in collection", "missing", "voucher elsewhere", "duplicates elsewhere"	http://rs.tdwg.org/dwc/terms/disposition	xs:string
35	Occurrence	otherCatalogNumbers	A list (concatenated and separated) of previous or alternate fully qualified catalog numbers or other human-used identifiers for the same Occurrence, whether in the current or any other data set or collection.	"FMNH:Mammal:1234", "NPS YELLO6778; MBG 33424"	http://rs.tdwg.org/dwc/terms/otherCatalogNumbers	xs:string
36	Occurrence	previousIdentifications	A list (concatenated and separated) of previous assignments of names to the Occurrence.	"Anthus sp., field ID by G. Iglesias; Anthus correndera, expert ID by C. Cicero 2009-02-12 based on morphology"	http://rs.tdwg.org/dwc/terms/previousIdentifications	xs:string
37	Occurrence	associatedMedia	A list (concatenated and separated) of identifiers (publication, global unique identifier, URI) of media associated with the Occurrence.	"http://arctos.database.museum/SpecimenImages/UAMObs/Mamm/2/P7291179.JPG"	http://rs.tdwg.org/dwc/terms/associatedMedia	xs:string
38	Occurrence	associatedReferences	A list (concatenated and separated) of identifiers (publication, bibliographic reference, global unique identifier, URI) of literature associated with the Occurrence.	"http://www.sciencemag.org/cgi/content/abstract/322/5899/261", "Christopher J. Conroy, Jennifer L. Neuwald. 2008. Phylogeographic study of the California vole, Microtus californicus Journal of Mammalogy, 89(3):755-767."	http://rs.tdwg.org/dwc/terms/associatedReferences	xs:string
39	Occurrence	associatedOccurrences	A list (concatenated and separated) of identifiers of other Occurrence records and their associations to this Occurrence.	"sibling of FMNH:Mammal:1234; sibling of FMNH:Mammal:1235"	http://rs.tdwg.org/dwc/terms/associatedOccurrences	xs:string
40	Occurrence	associatedSequences	A list (concatenated and separated) of identifiers (publication, global unique identifier, URI) of genetic sequence information associated with the Occurrence.	"GenBank: U34853.1"	http://rs.tdwg.org/dwc/terms/associatedSequences	xs:string
41	Occurrence	associatedTaxa	A list (concatenated and separated) of identifiers or names of taxa and their associations with the Occurrence.	"host: Quercus alba"	http://rs.tdwg.org/dwc/terms/associatedTaxa	xs:string
42	Event	eventID	An identifier for the set of information associated with an Event (something that occurs at a place and time). May be a global unique identifier or an identifier specific to the data set.		http://rs.tdwg.org/dwc/terms/eventID	dwc:nonEmptyString
43	Event	samplingProtocol	The name of, reference to, or description of the method or protocol used during an Event.	"UV light trap", "mist net", "bottom trawl", "ad hoc observation", "point count", "Penguins from space: faecal stains reveal the location of emperor penguin colonies, http://dx.doi.org/10.1111/j.1466-8238.2009.00467.x", "Takats et al. 2001. Guidelines for Nocturnal Owl Monitoring in North America. Beaverhill Bird Observatory and Bird Studies Canada, Edmonton, Alberta. 32 pp.", "http://www.bsc-eoc…	http://rs.tdwg.org/dwc/terms/samplingProtocol	xs:string
44	Event	samplingEffort	The amount of effort expended during an Event.	"40 trap-nights", "10 observer-hours; 10 km by foot; 30 km by car"	http://rs.tdwg.org/dwc/terms/samplingEffort	xs:string
45	Event	eventDate	The date-time or interval during which an Event occurred. For occurrences, this is the date-time when the event was recorded. Not suitable for a time in a geological context. Recommended best practice is to use an encoding scheme, such as ISO 8601:2004(E).	"1963-03-08T14:07-0600" is 8 Mar 1963 2:07pm in the time zone six hours earlier than UTC, "2009-02-20T08:40Z" is 20 Feb 2009 8:40am UTC, "1809-02-12" is 12 Feb 1809, "1906-06" is Jun 1906, "1971" is just that year, "2007-03-01T13:00:00Z/2008-05-11T15:30:00Z" is the interval between 1 Mar 2007 1pm UTC and 11 May 2008 3:30pm UTC, "2007-11-13/15" is the interval between 13 Nov 2007 and 15 Nov 2007.	http://rs.tdwg.org/dwc/terms/eventDate	xs:dateTime
46	Event	eventTime	The time or interval during which an Event occurred. Recommended best practice is to use an encoding scheme, such as ISO 8601:2004(E).	"14:07-0600" is 2:07pm in the time zone six hours earlier than UTC, "08:40:21Z" is 8:40:21am UTC, "13:00:00Z/15:30:00Z" is the interval between 1pm UTC and 3:30pm UTC.	http://rs.tdwg.org/dwc/terms/eventTime	xs:time
47	Event	startDayOfYear	The earliest ordinal day of the year on which the Event occurred (1 for January 1, 365 for December 31, except in a leap year, in which case it is 366).	"1" (=1 Jan), "366" (=31 Dec), "365" (=30 Dec in a leap year, 31 Dec in a non-leap year)	http://rs.tdwg.org/dwc/terms/startDayOfYear	dwc:dayOfYearDataType
48	Event	endDayOfYear	The latest ordinal day of the year on which the Event occurred (1 for January 1, 365 for December 31, except in a leap year, in which case it is 366).	"1" (=1 Jan), "366" (=31 Dec), "365" (=30 Dec in a leap year, 31 Dec in a non-leap year)	http://rs.tdwg.org/dwc/terms/endDayOfYear	dwc:dayOfYearDataType
49	Event	year	The four-digit year in which the Event occurred, according to the Common Era Calendar.	"2008"	http://rs.tdwg.org/dwc/terms/year	xs:gYear
50	Event	month	The ordinal month in which the Event occurred.	"1" (=January), "10" (=October)	http://rs.tdwg.org/dwc/terms/month	xs:gMonth
51	Event	day	The integer day of the month on which the Event occurred.	"9", "28"	http://rs.tdwg.org/dwc/terms/day	xs:gDay
52	Event	verbatimEventDate	The verbatim original representation of the date and time information for an Event.	"spring 1910", "Marzo 2002", "1999-03-XX", "17IV1934"	http://rs.tdwg.org/dwc/terms/verbatimEventDate	xs:string
53	Event	habitat	A category or description of the habitat in which the Event occurred.	"oak savanna", "pre-cordilleran steppe"	http://rs.tdwg.org/dwc/terms/habitat	xs:string
54	Event	fieldNumber	An identifier given to the event in the field. Often serves as a link between field notes and the Event.	"RV Sol 87-03-08"	http://rs.tdwg.org/dwc/terms/fieldNumber	xs:string
55	Event	fieldNotes	One of a) an indicator of the existence of, b) a reference to (publication, URI), or c) the text of notes taken in the field about the Event.	"notes available in Grinnell-Miller Library"	http://rs.tdwg.org/dwc/terms/fieldNotes	xs:string
56	Event	eventRemarks	Comments or notes about the Event.	"after the recent rains the river is nearly at flood stage"	http://rs.tdwg.org/dwc/terms/eventRemarks	xs:string
57	dcterms:Location	locationID	An identifier for the set of location information (data associated with dcterms:Location). May be a global unique identifier or an identifier specific to the data set.		http://rs.tdwg.org/dwc/terms/locationID	dwc:nonEmptyString
58	dcterms:Location	higherGeographyID	An identifier for the geographic region within which the Location occurred. Recommended best practice is to use an persistent identifier from a controlled vocabulary such as the Getty Thesaurus of Geographic Names.	"TGN: 1002002" for Prov. Tierra del Fuego, Argentina	http://rs.tdwg.org/dwc/terms/higherGeographyID	dwc:nonEmptyString
59	dcterms:Location	higherGeography	A list (concatenated and separated) of geographic names less specific than the information captured in the locality term.	"South America; Argentina; Patagonia; Parque Nacional Nahuel Huapi; Neuquén; Los Lagos" with accompanying values "South America" in Continent, "Argentina" in Country, "Neuquén" in StateProvince, and Los Lagos in County.	http://rs.tdwg.org/dwc/terms/higherGeography	xs:string
60	dcterms:Location	continent	The name of the continent in which the Location occurs. Recommended best practice is to use a controlled vocabulary such as the Getty Thesaurus of Geographic Names or the ISO 3166 Continent code.	"Antarctica"	http://rs.tdwg.org/dwc/terms/continent	xs:string
61	dcterms:Location	waterBody	The name of the water body in which the Location occurs. Recommended best practice is to use a controlled vocabulary such as the Getty Thesaurus of Geographic Names.	"Indian Ocean", "Baltic Sea"	http://rs.tdwg.org/dwc/terms/waterBody	xs:string
62	dcterms:Location	islandGroup	The name of the island group in which the Location occurs. Recommended best practice is to use a controlled vocabulary such as the Getty Thesaurus of Geographic Names.	"Alexander Archipelago"	http://rs.tdwg.org/dwc/terms/islandGroup	xs:string
63	dcterms:Location	island	The name of the island on or near which the Location occurs. Recommended best practice is to use a controlled vocabulary such as the Getty Thesaurus of Geographic Names.	"Isla Victoria"	http://rs.tdwg.org/dwc/terms/island	xs:string
64	dcterms:Location	country	The name of the country or major administrative unit in which the Location occurs. Recommended best practice is to use a controlled vocabulary such as the Getty Thesaurus of Geographic Names.	"Denmark", "Colombia", "España"	http://rs.tdwg.org/dwc/terms/country	xs:string
65	dcterms:Location	countryCode	The standard code for the country in which the Location occurs. Recommended best practice is to use ISO 3166-1-alpha-2 country codes.	"AR" for Argentina, "SV" for El Salvador	http://rs.tdwg.org/dwc/terms/countryCode	xs:string
66	dcterms:Location	stateProvince	The name of the next smaller administrative region than country (state, province, canton, department, region, etc.) in which the Location occurs.	"Montana", "Minas Gerais", "Córdoba"	http://rs.tdwg.org/dwc/terms/stateProvince	xs:string
67	dcterms:Location	county	The full, unabbreviated name of the next smaller administrative region than stateProvince (county, shire, department, etc.) in which the Location occurs.	"Missoula", "Los Lagos", "Mataró"	http://rs.tdwg.org/dwc/terms/county	xs:string
68	dcterms:Location	municipality	The full, unabbreviated name of the next smaller administrative region than county (city, municipality, etc.) in which the Location occurs. Do not use this term for a nearby named place that does not contain the actual location.	"Holzminden"	http://rs.tdwg.org/dwc/terms/municipality	xs:string
69	dcterms:Location	locality	The specific description of the place. Less specific geographic information can be provided in other geographic terms (higherGeography, continent, country, stateProvince, county, municipality, waterBody, island, islandGroup). This term may contain information modified from the original to correct perceived errors or standardize the description.	"Bariloche, 25 km NNE via Ruta Nacional 40 (=Ruta 237)"	http://rs.tdwg.org/dwc/terms/locality	xs:string
70	dcterms:Location	verbatimLocality	The original textual description of the place.	"25 km NNE Bariloche por R. Nac. 237"	http://rs.tdwg.org/dwc/terms/verbatimLocality	xs:string
71	dcterms:Location	verbatimElevation	The original description of the elevation (altitude, usually above sea level) of the Location.	"100-200 m"	http://rs.tdwg.org/dwc/terms/verbatimElevation	xs:string
72	dcterms:Location	minimumElevationInMeters	The lower limit of the range of elevation (altitude, usually above sea level), in meters.	"100"	http://rs.tdwg.org/dwc/terms/minimumElevationInMeters	xs:double
73	dcterms:Location	maximumElevationInMeters	The upper limit of the range of elevation (altitude, usually above sea level), in meters.	"200"	http://rs.tdwg.org/dwc/terms/maximumElevationInMeters	xs:double
74	dcterms:Location	verbatimDepth	The original description of the depth below the local surface.	"100-200 m"	http://rs.tdwg.org/dwc/terms/verbatimDepth	xs:string
75	dcterms:Location	minimumDepthInMeters	The lesser depth of a range of depth below the local surface, in meters.	"100"	http://rs.tdwg.org/dwc/terms/minimumDepthInMeters	xs:double
76	dcterms:Location	maximumDepthInMeters	The greater depth of a range of depth below the local surface, in meters.	"200"	http://rs.tdwg.org/dwc/terms/maximumDepthInMeters	xs:double
77	dcterms:Location	minimumDistanceAboveSurfaceInMeters	The lesser distance in a range of distance from a reference surface in the vertical direction, in meters. Use positive values for locations above the surface, negative values for locations below. If depth measures are given, the reference surface is the location given by the depth, otherwise the reference surface is the location given by the elevation.	1.5 meter sediment core from the bottom of a lake (at depth 20m) at 300m elevation; VerbatimElevation: "300m" MinimumElevationInMeters: "300", MaximumElevationInMeters: "300", VerbatimDepth: "20m", MinumumDepthInMeters: "20", MaximumDepthInMeters: "20", DistanceAboveSurfaceInMetersMinimum: "0", DistanceAboveSurfaceInMetersMaximum: "-1.5"	http://rs.tdwg.org/dwc/terms/minimumDistanceAboveSurfaceInMeters	xs:double
78	dcterms:Location	maximumDistanceAboveSurfaceInMeters	The greater distance in a range of distance from a reference surface in the vertical direction, in meters. Use positive values for locations above the surface, negative values for locations below. If depth measures are given, the reference surface is the location given by the depth, otherwise the reference surface is the location given by the elevation.	1.5 meter sediment core from the bottom of a lake (at depth 20m) at 300m elevation; VerbatimElevation: "300m" MinimumElevationInMeters: "300", MaximumElevationInMeters: "300", VerbatimDepth: "20m", MinumumDepthInMeters: "20", MaximumDepthInMeters: "20", DistanceAboveSurfaceInMetersMinimum: "0", DistanceAboveSurfaceInMetersMaximum: "-1.5"	http://rs.tdwg.org/dwc/terms/maximumDistanceAboveSurfaceInMeters	xs:double
79	dcterms:Location	locationAccordingTo	Information about the source of this Location information. Could be a publication (gazetteer), institution, or team of individuals.	"Getty Thesaurus of Geographic Names", "GADM"	http://rs.tdwg.org/dwc/terms/locationAccordingTo	xs:string
80	dcterms:Location	locationRemarks	Comments or notes about the Location.	"under water since 2005"	http://rs.tdwg.org/dwc/terms/locationRemarks	xs:string
81	dcterms:Location	verbatimCoordinates	The verbatim original spatial coordinates of the Location. The coordinate ellipsoid, geodeticDatum, or full Spatial Reference System (SRS) for these coordinates should be stored in verbatimSRS and the coordinate system should be stored in verbatimCoordinateSystem.	"41 05 54S 121 05 34W", "17T 630000 4833400"	http://rs.tdwg.org/dwc/terms/verbatimCoordinates	xs:string
82	dcterms:Location	verbatimLatitude	The verbatim original latitude of the Location. The coordinate ellipsoid, geodeticDatum, or full Spatial Reference System (SRS) for these coordinates should be stored in verbatimSRS and the coordinate system should be stored in verbatimCoordinateSystem.	"41 05 54.03S"	http://rs.tdwg.org/dwc/terms/verbatimLatitude	xs:string
83	dcterms:Location	verbatimLongitude	The verbatim original longitude of the Location. The coordinate ellipsoid, geodeticDatum, or full Spatial Reference System (SRS) for these coordinates should be stored in verbatimSRS and the coordinate system should be stored in verbatimCoordinateSystem.	"121d 10' 34" W"	http://rs.tdwg.org/dwc/terms/verbatimLongitude	xs:string
84	dcterms:Location	verbatimCoordinateSystem	The spatial coordinate system for the verbatimLatitude and verbatimLongitude or the verbatimCoordinates of the Location. Recommended best practice is to use a controlled vocabulary.	"decimal degrees", "degrees decimal minutes", "degrees minutes seconds", "UTM"	http://rs.tdwg.org/dwc/terms/verbatimCoordinateSystem	xs:string
85	dcterms:Location	verbatimSRS	The ellipsoid, geodetic datum, or spatial reference system (SRS) upon which coordinates given in verbatimLatitude and verbatimLongitude, or verbatimCoordinates are based. Recommended best practice is use the EPSG code as a controlled vocabulary to provide an SRS, if known. Otherwise use a controlled vocabulary for the name or code of the geodetic datum, if known. Otherwise use a controlled vocabu…	"EPSG:4326", "WGS84", "NAD27", "Campo Inchauspe", "European 1950", "Clarke 1866"	http://rs.tdwg.org/dwc/terms/verbatimSRS	xs:string
86	dcterms:Location	decimalLatitude	The geographic latitude (in decimal degrees, using the spatial reference system given in geodeticDatum) of the geographic center of a Location. Positive values are north of the Equator, negative values are south of it. Legal values lie between -90 and 90, inclusive.	"-41.0983423"	http://rs.tdwg.org/dwc/terms/decimalLatitude	dwc:decimalLatitudeDataType
87	dcterms:Location	decimalLongitude	The geographic longitude (in decimal degrees, using the spatial reference system given in geodeticDatum) of the geographic center of a Location. Positive values are east of the Greenwich Meridian, negative values are west of it. Legal values lie between -180 and 180, inclusive.	"-121.1761111"	http://rs.tdwg.org/dwc/terms/decimalLongitude	dwc:decimalLongitudeDataType
88	dcterms:Location	geodeticDatum	The ellipsoid, geodetic datum, or spatial reference system (SRS) upon which the geographic coordinates given in decimalLatitude and decimalLongitude as based. Recommended best practice is use the EPSG code as a controlled vocabulary to provide an SRS, if known. Otherwise use a controlled vocabulary for the name or code of the geodetic datum, if known. Otherwise use a controlled vocabulary for the…	"EPSG:4326", "WGS84", "NAD27", "Campo Inchauspe", "European 1950", "Clarke 1866"	http://rs.tdwg.org/dwc/terms/geodeticDatum	xs:string
89	dcterms:Location	coordinateUncertaintyInMeters	The horizontal distance (in meters) from the given decimalLatitude and decimalLongitude describing the smallest circle containing the whole of the Location. Leave the value empty if the uncertainty is unknown, cannot be estimated, or is not applicable (because there are no coordinates). Zero is not a valid value for this term.	"30" (reasonable lower limit of a GPS reading under good conditions if the actual precision was not recorded at the time), "71" (uncertainty for a UTM coordinate having 100 meter precision and a known spatial reference system).	http://rs.tdwg.org/dwc/terms/coordinateUncertaintyInMeters	xs:double
90	dcterms:Location	coordinatePrecision	A decimal representation of the precision of the coordinates given in the decimalLatitude and decimalLongitude.	"0.00001" (normal GPS limit for decimal degrees), "0.000278" (nearest second), "0.01667" (nearest minute), "1.0" (nearest degree)	http://rs.tdwg.org/dwc/terms/coordinatePrecision	xs:string
91	dcterms:Location	pointRadiusSpatialFit	The ratio of the area of the point-radius (decimalLatitude, decimalLongitude, coordinateUncertaintyInMeters) to the area of the true (original, or most specific) spatial representation of the Location. Legal values are 0, greater than or equal to 1, or undefined. A value of 1 is an exact match or 100% overlap. A value of 0 should be used if the given point-radius does not completely contain the o…	Detailed explanations with graphical examples can be found in the "Guide to Best Practices for Georeferencing", Chapman and Wieczorek, eds. 2006 (http://www.gbif.org/prog/digit/Georeferencing).	http://rs.tdwg.org/dwc/terms/pointRadiusSpatialFit	dwc:spatialFitDataType
92	dcterms:Location	footprintWKT	A Well-Known Text (WKT) representation of the shape (footprint, geometry) that defines the Location. A Location may have both a point-radius representation (see decimalLatitude) and a footprint representation, and they may differ from each other.	the one-degree bounding box with opposite corners at (longitude=10, latitude=20) and (longitude=11, latitude=21) would be expressed in well-known text as POLYGON ((10 20, 11 20, 11 21, 10 21, 10 20))	http://rs.tdwg.org/dwc/terms/footprintWKT	xs:string
93	dcterms:Location	footprintSRS	A Well-Known Text (WKT) representation of the Spatial Reference System (SRS) for the footprintWKT of the Location. Do not use this term to describe the SRS of the decimalLatitude and decimalLongitude, even if it is the same as for the footprintWKT - use the geodeticDatum instead.	The WKT for the standard WGS84 SRS (EPSG:4326) is "GEOGCS["GCS_WGS_1984",DATUM["D_WGS_1984",SPHEROID["WGS_1984",6378137,298.257223563]],PRIMEM["Greenwich",0],UNIT["Degree",0.0174532925199433]]" without the enclosing quotes.	http://rs.tdwg.org/dwc/terms/footprintSRS	xs:string
94	dcterms:Location	footprintSpatialFit	The ratio of the area of the footprint (footprintWKT) to the area of the true (original, or most specific) spatial representation of the Location. Legal values are 0, greater than or equal to 1, or undefined. A value of 1 is an exact match or 100% overlap. A value of 0 should be used if the given footprint does not completely contain the original representation. The footprintSpatialFit is undefin…	Detailed explanations with graphical examples can be found in the "Guide to Best Practices for Georeferencing", Chapman and Wieczorek, eds. 2006 (http://www.gbif.org/prog/digit/Georeferencing).	http://rs.tdwg.org/dwc/terms/footprintSpatialFit	dwc:spatialFitDataType
95	dcterms:Location	georeferencedBy	A list (concatenated and separated) of names of people, groups, or organizations who determined the georeference (spatial representation) for the Location.	"Kristina Yamamoto (MVZ); Janet Fang (MVZ)", "Brad Millen (ROM)"	http://rs.tdwg.org/dwc/terms/georeferencedBy	xs:string
96	dcterms:Location	georeferencedDate	The date on which the Location was georeferenced. Recommended best practice is to use an encoding scheme, such as ISO 8601:2004(E).	"1963-03-08T14:07-0600" is 8 Mar 1963 2:07pm in the time zone six hours earlier than UTC, "2009-02-20T08:40Z" is 20 Feb 2009 8:40am UTC, "1809-02-12" is 12 Feb 1809, "1906-06" is Jun 1906, "1971" is just that year, "2007-03-01T13:00:00Z/2008-05-11T15:30:00Z" is the interval between 1 Mar 2007 1pm UTC and 11 May 2008 3:30pm UTC, "2007-11-13/15" is the interval between 13 Nov 2007 and 15 Nov 2007.	http://rs.tdwg.org/dwc/terms/georeferencedDate
97	dcterms:Location	georeferenceProtocol	A description or reference to the methods used to determine the spatial footprint, coordinates, and uncertainties.	"Guide to Best Practices for Georeferencing" (Chapman and Wieczorek, eds. 2006), Global Biodiversity Information Facility.", "MaNIS/HerpNet/ORNIS Georeferencing Guidelines", "BioGeomancer"	http://rs.tdwg.org/dwc/terms/georeferenceProtocol	xs:string
98	dcterms:Location	georeferenceSources	A list (concatenated and separated) of maps, gazetteers, or other resources used to georeference the Location, described specifically enough to allow anyone in the future to use the same resources.	"USGS 1:24000 Florence Montana Quad; Terrametrics 2008 on Google Earth"	http://rs.tdwg.org/dwc/terms/georeferenceSources	xs:string
99	dcterms:Location	georeferenceVerificationStatus	A categorical description of the extent to which the georeference has been verified to represent the best possible spatial description. Recommended best practice is to use a controlled vocabulary.	"requires verification", "verified by collector", "verified by curator".	http://rs.tdwg.org/dwc/terms/georeferenceVerificationStatus	xs:string
100	dcterms:Location	georeferenceRemarks	Notes or comments about the spatial description determination, explaining assumptions made in addition or opposition to the those formalized in the method referred to in georeferenceProtocol.	"assumed distance by road (Hwy. 101)"	http://rs.tdwg.org/dwc/terms/georeferenceRemarks	xs:string
101	Identification	identificationID	An identifier for the Identification (the body of information associated with the assignment of a scientific name). May be a global unique identifier or an identifier specific to the data set.		http://rs.tdwg.org/dwc/terms/identificationID	dwc:nonEmptyString
102	Identification	identifiedBy	A list (concatenated and separated) of names of people, groups, or organizations who assigned the Taxon to the subject.	"James L. Patton", "Theodore Pappenfuss; Robert Macey"	http://rs.tdwg.org/dwc/terms/identifiedBy	xs:string
103	Identification	dateIdentified	The date on which the subject was identified as representing the Taxon. Recommended best practice is to use an encoding scheme, such as ISO 8601:2004(E).	"1963-03-08T14:07-0600" is 8 Mar 1963 2:07pm in the time zone six hours earlier than UTC, "2009-02-20T08:40Z" is 20 Feb 2009 8:40am UTC, "1809-02-12" is 12 Feb 1809, "1906-06" is Jun 1906, "1971" is just that year, "2007-03-01T13:00:00Z/2008-05-11T15:30:00Z" is the interval between 1 Mar 2007 1pm UTC and 11 May 2008 3:30pm UTC, "2007-11-13/15" is the interval between 13 Nov 2007 and 15 Nov 2007.	http://rs.tdwg.org/dwc/terms/dateIdentified	xs:dateTime
104	Identification	identificationReferences	A list (concatenated and separated) of references (publication, global unique identifier, URI) used in the Identification.	"Aves del Noroeste Patagonico. Christie et al. 2004."	http://rs.tdwg.org/dwc/terms/identificationReferences	xs:string
105	Identification	identificationVerificationStatus	A categorical indicator of the extent to which the taxonomic identification has been verified to be correct. Recommended best practice is to use a controlled vocabulary such as that used in HISPID/ABCD.	"0", "4"	http://rs.tdwg.org/dwc/terms/identificationVerificationStatus
106	Identification	identificationRemarks	Comments or notes about the Identification.	"Distinguished between Anthus correndera and Anthus hellmayri based on the comparative lengths of the uñas."	http://rs.tdwg.org/dwc/terms/identificationRemarks	xs:string
107	Identification	identificationQualifier	A brief phrase or a standard term ("cf.", "aff.") to express the determiner's doubts about the Identification.	1) For the determination "Quercus aff. agrifolia var. oxyadenia", identificationQualifier would be "aff. agrifolia var. oxyadenia" with accompanying values "Quercus" in genus, "agrifolia" in specificEpithet, "oxyadenia" in infraspecificEpithet, and "var." in rank. 2) For the determination "Quercus agrifolia cf. var. oxyadenia", identificationQualifier would be "cf. var. oxyadenia " with accompany…	http://rs.tdwg.org/dwc/terms/identificationQualifier	xs:string
108	Identification	typeStatus	A list (concatenated and separated) of nomenclatural types (type status, typified scientific name, publication) applied to the subject.	"holotype of Ctenomys sociabilis. Pearson O. P., and M. I. Christie. 1985. Historia Natural, 5(37):388"	http://rs.tdwg.org/dwc/terms/typeStatus	xs:string
109	Taxon	taxonID	An identifier for the set of taxon information (data associated with the Taxon class). May be a global unique identifier or an identifier specific to the data set.	"8fa58e08-08de-4ac1-b69c-1235340b7001", "32567", "http://species.gbif.org/abies_alba_1753", "urn:lsid:gbif.org:usages:32567"	http://rs.tdwg.org/dwc/terms/taxonID	dwc:nonEmptyString
110	Taxon	scientificNameID	An identifier for the nomenclatural (not taxonomic) details of a scientific name.	"urn:lsid:ipni.org:names:37829-1:1.3"	http://rs.tdwg.org/dwc/terms/scientificNameID	dwc:nonEmptyString
111	Taxon	acceptedNameUsageID	An identifier for the name usage (documented meaning of the name according to a source) of the currently valid (zoological) or accepted (botanical) taxon.	"8fa58e08-08de-4ac1-b69c-1235340b7001"	http://rs.tdwg.org/dwc/terms/acceptedNameUsageID	dwc:nonEmptyString
112	Taxon	parentNameUsageID	An identifier for the name usage (documented meaning of the name according to a source) of the direct, most proximate higher-rank parent taxon (in a classification) of the most specific element of the scientificName.	"8fa58e08-08de-4ac1-b69c-1235340b7001"	http://rs.tdwg.org/dwc/terms/parentNameUsageID	dwc:nonEmptyString
113	Taxon	originalNameUsageID	An identifier for the name usage (documented meaning of the name according to a source) in which the terminal element of the scientificName was originally established under the rules of the associated nomenclaturalCode.	"http://species.gbif.org/abies_alba_1753"	http://rs.tdwg.org/dwc/terms/originalNameUsageID	dwc:nonEmptyString
114	Taxon	nameAccordingToID	An identifier for the source in which the specific taxon concept circumscription is defined or implied. See nameAccordingTo.	"doi:10.1016/S0269-915X(97)80026-2"	http://rs.tdwg.org/dwc/terms/nameAccordingToID	xs:string
115	Taxon	namePublishedInID	An identifier for the publication in which the scientificName was originally established under the rules of the associated nomenclaturalCode.	"http://hdl.handle.net/10199/7"	http://rs.tdwg.org/dwc/terms/namePublishedInID	xs:string
116	Taxon	namePublishedInYear	The four-digit year in which the scientificName was published.	"1915", "2008"	http://rs.tdwg.org/dwc/terms/namePublishedInYear
117	Taxon	taxonConceptID	An identifier for the taxonomic concept to which the record refers - not for the nomenclatural details of a taxon.	"8fa58e08-08de-4ac1-b69c-1235340b7001"	http://rs.tdwg.org/dwc/terms/taxonConceptID	xs:string
118	Taxon	scientificName	The full scientific name, with authorship and date information if known. When forming part of an Identification, this should be the name in lowest level taxonomic rank that can be determined. This term should not contain identification qualifications, which should instead be supplied in the IdentificationQualifier term.	"Coleoptera" (order), "Vespertilionidae" (family), "Manis" (genus), "Ctenomys sociabilis" (genus + specificEpithet), "Ambystoma tigrinum diaboli" (genus + specificEpithet + infraspecificEpithet), "Roptrocerus typographi (Györfi, 1952)" (genus + specificEpithet + scientificNameAuthorship), "Quercus agrifolia var. oxyadenia (Torr.) J.T. Howell" (genus + specificEpithet + taxonRank + infraspecificEp…	http://rs.tdwg.org/dwc/terms/scientificName	xs:string
119	Taxon	acceptedNameUsage	The full name, with authorship and date information if known, of the currently valid (zoological) or accepted (botanical) taxon.	"Tamias minimus" valid name for "Eutamias minimus"	http://rs.tdwg.org/dwc/terms/acceptedNameUsage	xs:string
120	Taxon	parentNameUsage	The full name, with authorship and date information if known, of the direct, most proximate higher-rank parent taxon (in a classification) of the most specific element of the scientificName.	"Rubiaceae", "Gruiformes", "Testudinae"	http://rs.tdwg.org/dwc/terms/parentNameUsage	xs:string
121	Taxon	originalNameUsage	The taxon name, with authorship and date information if known, as it originally appeared when first established under the rules of the associated nomenclaturalCode. The basionym (botany) or basonym (bacteriology) of the scientificName or the senior/earlier homonym for replaced names.	"Pinus abies", "Gasterosteus saltatrix Linnaeus 1768"	http://rs.tdwg.org/dwc/terms/originalNameUsage	xs:string
122	Taxon	nameAccordingTo	The reference to the source in which the specific taxon concept circumscription is defined or implied - traditionally signified by the Latin "sensu" or "sec." (from secundum, meaning "according to"). For taxa that result from identifications, a reference to the keys, monographs, experts and other sources should be given.	"McCranie, J. R., D. B. Wake, and L. D. Wilson. 1996. The taxonomic status of Bolitoglossa schmidti, with comments on the biology of the Mesoamerican salamander Bolitoglossa dofleini (Caudata: Plethodontidae). Carib. J. Sci. 32:395-398.", "Werner Greuter 2008", "Lilljeborg 1861, Upsala Univ. Arsskrift, Math. Naturvet., pp. 4, 5"	http://rs.tdwg.org/dwc/terms/nameAccordingTo	xs:string
123	Taxon	namePublishedIn	A reference for the publication in which the scientificName was originally established under the rules of the associated nomenclaturalCode.	"Pearson O. P., and M. I. Christie. 1985. Historia Natural, 5(37):388", "Forel, Auguste, Diagnosies provisoires de quelques espèces nouvelles de fourmis de Madagascar, récoltées par M. Grandidier., Annales de la Societe Entomologique de Belgique, Comptes-rendus des Seances 30, 1886"	http://rs.tdwg.org/dwc/terms/namePublishedIn	xs:string
124	Taxon	higherClassification	A list (concatenated and separated) of taxa names terminating at the rank immediately superior to the taxon referenced in the taxon record. Recommended best practice is to order the list starting with the highest rank and separating the names for each rank with a semi-colon (";").	"Animalia;Chordata;Vertebrata;Mammalia;Theria;Eutheria;Rodentia;Hystricognatha;Hystricognathi;Ctenomyidae;Ctenomyini;Ctenomys"	http://rs.tdwg.org/dwc/terms/higherClassification	xs:string
125	Taxon	kingdom	The full scientific name of the kingdom in which the taxon is classified.	"Animalia", "Plantae"	http://rs.tdwg.org/dwc/terms/kingdom	xs:string
126	Taxon	phylum	The full scientific name of the phylum or division in which the taxon is classified.	"Chordata" (phylum), "Bryophyta" (division)	http://rs.tdwg.org/dwc/terms/phylum	xs:string
127	Taxon	class	The full scientific name of the class in which the taxon is classified.	"Mammalia", "Hepaticopsida"	http://rs.tdwg.org/dwc/terms/class	xs:string
128	Taxon	order	The full scientific name of the order in which the taxon is classified.	"Carnivora", "Monocleales"	http://rs.tdwg.org/dwc/terms/order	xs:string
129	Taxon	family	The full scientific name of the family in which the taxon is classified.	"Felidae", "Monocleaceae"	http://rs.tdwg.org/dwc/terms/family	xs:string
130	Taxon	genus	The full scientific name of the genus in which the taxon is classified.	"Puma", "Monoclea"	http://rs.tdwg.org/dwc/terms/genus	xs:string
131	Taxon	subgenus	The full scientific name of the subgenus in which the taxon is classified. Values should include the genus to avoid homonym confusion.	"Strobus (Pinus)", "Puma (Puma)" "Loligo (Amerigo)", "Hieracium subgen. Pilosella"	http://rs.tdwg.org/dwc/terms/subgenus	xs:string
132	Taxon	specificEpithet	The name of the first or species epithet of the scientificName.	"concolor", "gottschei"	http://rs.tdwg.org/dwc/terms/specificEpithet	xs:string
133	Taxon	infraspecificEpithet	The name of the lowest or terminal infraspecific epithet of the scientificName, excluding any rank designation.	"concolor", "oxyadenia", "sayi"	http://rs.tdwg.org/dwc/terms/infraspecificEpithet	xs:string
134	Taxon	taxonRank	The taxonomic rank of the most specific name in the scientificName. Recommended best practice is to use a controlled vocabulary.	"subspecies", "varietas", "forma", "species", "genus"	http://rs.tdwg.org/dwc/terms/taxonRank	xs:string
135	Taxon	verbatimTaxonRank	The taxonomic rank of the most specific name in the scientificName as it appears in the original record.	"Agamospecies", "sub-lesus", "prole", "apomict", "nothogrex", "sp.", "subsp.", "var."	http://rs.tdwg.org/dwc/terms/verbatimTaxonRank	xs:string
136	Taxon	scientificNameAuthorship	The authorship information for the scientificName formatted according to the conventions of the applicable nomenclaturalCode.	"(Torr.) J.T. Howell", "(Martinovský) Tzvelev", "(Györfi, 1952)"	http://rs.tdwg.org/dwc/terms/scientificNameAuthorship	xs:string
137	Taxon	vernacularName	A common or vernacular name.	"Andean Condor", "Condor Andino", "American Eagle", "Gänsegeier"	http://rs.tdwg.org/dwc/terms/vernacularName	xs:string
138	Taxon	nomenclaturalCode	The nomenclatural code (or codes in the case of an ambiregnal name) under which the scientificName is constructed. Recommended best practice is to use a controlled vocabulary.	"ICBN", "ICZN", "BC", "ICNCP", "BioCode", "ICZN; ICBN"	http://rs.tdwg.org/dwc/terms/nomenclaturalCode	xs:string
139	Taxon	taxonomicStatus	The status of the use of the scientificName as a label for a taxon. Requires taxonomic opinion to define the scope of a taxon. Rules of priority then are used to define the taxonomic status of the nomenclature contained in that scope, combined with the experts opinion. It must be linked to a specific taxonomic reference that defines the concept. Recommended best practice is to use a controlled vo…	"invalid", "misapplied", "homotypic synonym", "accepted"	http://rs.tdwg.org/dwc/terms/taxonomicStatus	xs:string
140	Taxon	nomenclaturalStatus	The status related to the original publication of the name and its conformance to the relevant rules of nomenclature. It is based essentially on an algorithm according to the business rules of the code. It requires no taxonomic opinion.	"nom. ambig.", "nom. illeg.", "nom. subnud."	http://rs.tdwg.org/dwc/terms/nomenclaturalStatus	xs:string
141	Taxon	taxonRemarks	Comments or notes about the taxon or name.	"this name is a misspelling in common use"	http://rs.tdwg.org/dwc/terms/taxonRemarks	xs:string
142	GeologicalContext	geologicalContextID	An identifier for the set of information associated with a GeologicalContext (the location within a geological context, such as stratigraphy). May be a global unique identifier or an identifier specific to the data set.		http://rs.tdwg.org/dwc/terms/geologicalContextID	dwc:nonEmptyString
143	GeologicalContext	earliestEonOrLowestEonothem	The full name of the earliest possible geochronologic eon or lowest chrono-stratigraphic eonothem or the informal name ("Precambrian") attributable to the stratigraphic horizon from which the cataloged item was collected.	"Phanerozoic", "Proterozoic"	http://rs.tdwg.org/dwc/terms/earliestEonOrLowestEonothem	xs:string
144	GeologicalContext	latestEonOrHighestEonothem	The full name of the latest possible geochronologic eon or highest chrono-stratigraphic eonothem or the informal name ("Precambrian") attributable to the stratigraphic horizon from which the cataloged item was collected.	"Phanerozoic", "Proterozoic"	http://rs.tdwg.org/dwc/terms/latestEonOrHighestEonothem	xs:string
145	GeologicalContext	earliestEraOrLowestErathem	The full name of the earliest possible geochronologic era or lowest chronostratigraphic erathem attributable to the stratigraphic horizon from which the cataloged item was collected.	"Cenozoic", "Mesozoic"	http://rs.tdwg.org/dwc/terms/earliestEraOrLowestErathem	xs:string
146	GeologicalContext	latestEraOrHighestErathem	The full name of the latest possible geochronologic era or highest chronostratigraphic erathem attributable to the stratigraphic horizon from which the cataloged item was collected.	"Cenozoic", "Mesozoic"	http://rs.tdwg.org/dwc/terms/latestEraOrHighestErathem	xs:string
147	GeologicalContext	earliestPeriodOrLowestSystem	The full name of the earliest possible geochronologic period or lowest chronostratigraphic system attributable to the stratigraphic horizon from which the cataloged item was collected.	"Neogene", "Tertiary", "Quaternary"	http://rs.tdwg.org/dwc/terms/earliestPeriodOrLowestSystem	xs:string
148	GeologicalContext	latestPeriodOrHighestSystem	The full name of the latest possible geochronologic period or highest chronostratigraphic system attributable to the stratigraphic horizon from which the cataloged item was collected.	"Neogene", "Tertiary", "Quaternary"	http://rs.tdwg.org/dwc/terms/latestPeriodOrHighestSystem	xs:string
149	GeologicalContext	earliestEpochOrLowestSeries	The full name of the earliest possible geochronologic epoch or lowest chronostratigraphic series attributable to the stratigraphic horizon from which the cataloged item was collected.	"Holocene", "Pleistocene", "Ibexian Series"	http://rs.tdwg.org/dwc/terms/earliestEpochOrLowestSeries	xs:string
150	GeologicalContext	latestEpochOrHighestSeries	The full name of the latest possible geochronologic epoch or highest chronostratigraphic series attributable to the stratigraphic horizon from which the cataloged item was collected.	"Holocene", "Pleistocene", "Ibexian Series"	http://rs.tdwg.org/dwc/terms/latestEpochOrHighestSeries	xs:string
151	GeologicalContext	earliestAgeOrLowestStage	The full name of the earliest possible geochronologic age or lowest chronostratigraphic stage attributable to the stratigraphic horizon from which the cataloged item was collected.	"Atlantic", "Boreal", "Skullrockian"	http://rs.tdwg.org/dwc/terms/earliestAgeOrLowestStage	xs:string
152	GeologicalContext	latestAgeOrHighestStage	The full name of the latest possible geochronologic age or highest chronostratigraphic stage attributable to the stratigraphic horizon from which the cataloged item was collected.	"Atlantic", "Boreal", "Skullrockian"	http://rs.tdwg.org/dwc/terms/latestAgeOrHighestStage	xs:string
153	GeologicalContext	lowestBiostratigraphicZone	The full name of the lowest possible geological biostratigraphic zone of the stratigraphic horizon from which the cataloged item was collected.		http://rs.tdwg.org/dwc/terms/lowestBiostratigraphicZone	xs:string
154	GeologicalContext	highestBiostratigraphicZone	The full name of the highest possible geological biostratigraphic zone of the stratigraphic horizon from which the cataloged item was collected.		http://rs.tdwg.org/dwc/terms/highestBiostratigraphicZone	xs:string
155	GeologicalContext	lithostratigraphicTerms	The combination of all litho-stratigraphic names for the rock from which the cataloged item was collected.		http://rs.tdwg.org/dwc/terms/lithostratigraphicTerms	xs:string
156	GeologicalContext	group	The full name of the lithostratigraphic group from which the cataloged item was collected.		http://rs.tdwg.org/dwc/terms/group	xs:string
157	GeologicalContext	formation	The full name of the lithostratigraphic formation from which the cataloged item was collected.	"Notch Peak Fromation", "House Limestone", "Fillmore Formation"	http://rs.tdwg.org/dwc/terms/formation	xs:string
158	GeologicalContext	member	The full name of the lithostratigraphic member from which the cataloged item was collected.	"Lava Dam Member", "Hellnmaria Member"	http://rs.tdwg.org/dwc/terms/member	xs:string
159	GeologicalContext	bed	The full name of the lithostratigraphic bed from which the cataloged item was collected.		http://rs.tdwg.org/dwc/terms/bed	xs:string
160	ResourceRelationship	resourceRelationshipID	An identifier for an instance of relationship between one resource (the subject) and another (relatedResource, the object).		http://rs.tdwg.org/dwc/terms/resourceRelationshipID	dwc:nonEmptyString
161	ResourceRelationship	resourceID	An identifier for the resource that is the subject of the relationship.		http://rs.tdwg.org/dwc/terms/resourceID	dwc:nonEmptyString
162	ResourceRelationship	relatedResourceID	An identifier for a related resource (the object, rather than the subject of the relationship).		http://rs.tdwg.org/dwc/terms/relatedResourceID	dwc:nonEmptyString
163	ResourceRelationship	relationshipOfResource	The relationship of the resource identified by relatedResourceID to the subject (optionally identified by the resourceID). Recommended best practice is to use a controlled vocabulary.	"duplicate of", "mother of", "endoparasite of", "host to", "sibling of", "valid synonym of", "located within".	http://rs.tdwg.org/dwc/terms/relationshipOfResource	xs:string
164	ResourceRelationship	relationshipAccordingTo	The source (person, organization, publication, reference) establishing the relationship between the two resources.	"Julie Woodruff".	http://rs.tdwg.org/dwc/terms/relationshipAccordingTo	xs:string
165	ResourceRelationship	relationshipEstablishedDate	The date-time on which the relationship between the two resources was established. Recommended best practice is to use an encoding scheme, such as ISO 8601:2004(E).	"1963-03-08T14:07-0600" is 8 Mar 1963 2:07pm in the time zone six hours earlier than UTC, "2009-02-20T08:40Z" is 20 Feb 2009 8:40am UTC, "1809-02-12" is 12 Feb 1809, "1906-06" is Jun 1906, "1971" is just that year, "2007-03-01T13:00:00Z/2008-05-11T15:30:00Z" is the interval between 1 Mar 2007 1pm UTC and 11 May 2008 3:30pm UTC, "2007-11-13/15" is the interval between 13 Nov 2007 and 15 Nov 2007.	http://rs.tdwg.org/dwc/terms/relationshipEstablishedDate	xs:dateTime
166	ResourceRelationship	relationshipRemarks	Comments or notes about the relationship between the two resources.	"mother and offspring collected from the same nest", "pollinator captured in the act".	http://rs.tdwg.org/dwc/terms/relationshipRemarks	xs:string
167	MeasurementOrFact	measurementID	An identifier for the MeasurementOrFact (information pertaining to measurements, facts, characteristics, or assertions). May be a global unique identifier or an identifier specific to the data set.		http://rs.tdwg.org/dwc/terms/measurementID	dwc:nonEmptyString
168	MeasurementOrFact	measurementType	The nature of the measurement, fact, characteristic, or assertion. Recommended best practice is to use a controlled vocabulary.	"tail length", "temperature", "trap line length", "survey area", "trap type".	http://rs.tdwg.org/dwc/terms/measurementType	xs:string
169	MeasurementOrFact	measurementValue	The value of the measurement, fact, characteristic, or assertion.	"45", "20", "1", "14.5", "UV-light".	http://rs.tdwg.org/dwc/terms/measurementValue	xs:string
170	MeasurementOrFact	measurementAccuracy	The description of the potential error associated with the measurementValue.	"0.01", "normal distribution with variation of 2 m".	http://rs.tdwg.org/dwc/terms/measurementAccuracy	xs:string
171	MeasurementOrFact	measurementUnit	The units associated with the measurementValue. Recommended best practice is to use the International System of Units (SI).	"mm", "C", "km", "ha".	http://rs.tdwg.org/dwc/terms/measurementUnit	xs:string
172	MeasurementOrFact	measurementDeterminedDate	The date on which the MeasurementOrFact was made. Recommended best practice is to use an encoding scheme, such as ISO 8601:2004(E).	"1963-03-08T14:07-0600" is 8 Mar 1963 2:07pm in the time zone six hours earlier than UTC, "2009-02-20T08:40Z" is 20 Feb 2009 8:40am UTC, "1809-02-12" is 12 Feb 1809, "1906-06" is Jun 1906, "1971" is just that year, "2007-03-01T13:00:00Z/2008-05-11T15:30:00Z" is the interval between 1 Mar 2007 1pm UTC and 11 May 2008 3:30pm UTC, "2007-11-13/15" is the interval between 13 Nov 2007 and 15 Nov 2007.	http://rs.tdwg.org/dwc/terms/measurementDeterminedDate	xs:dateTime
173	MeasurementOrFact	measurementDeterminedBy	A list (concatenated and separated) of names of people, groups, or organizations who determined the value of the MeasurementOrFact.	"Javier de la Torre", "Julie Woodruff; Eileen Lacey".	http://rs.tdwg.org/dwc/terms/measurementDeterminedBy	xs:string
174	MeasurementOrFact	measurementMethod	A description of or reference to (publication, URI) the method or protocol used to determine the measurement, fact, characteristic, or assertion.	"minimum convex polygon around burrow entrances" for a home range area, "barometric altimeter" for an elevation.	http://rs.tdwg.org/dwc/terms/measurementMethod	xs:string
175	MeasurementOrFact	measurementRemarks	Comments or notes accompanying the MeasurementOrFact.	"tip of tail missing".	http://rs.tdwg.org/dwc/terms/measurementRemarks	xs:string
